# Supplementary material for: Postpartum Depression after Maternal Isolation during the COVID-19 Pandemic: The MUMI-19 Study (Mothers Undergoing Mental Impact of COVID-19 Pandemic)
Source: MDPI journal article supplement (doi:10.3390/jcm11195504), 2022-09-20
Supplement: s1 [file s1]

Supplementary Table S1 : Details of difficult obstetric history

|                                  | Total<br><i>n</i> = 264 | Lockdown group<br>(ld group)<br><i>n</i> = 129 | Post Lockdown Group<br>(pld group)<br><i>n</i> = 135 |
|----------------------------------|-------------------------|------------------------------------------------|------------------------------------------------------|
| Pre-eclampsia                    | <i>n</i> = 8            | <i>n</i> = 2                                   | <i>n</i> = 6                                         |
| Late term miscarriage            | <i>n</i> = 1            | <i>n</i> = 0                                   | <i>n</i> = 1                                         |
| Previous death in utero          | <i>n</i> = 4            | <i>n</i> = 2                                   | <i>n</i> = 2                                         |
| Neonatal death                   | <i>n</i> = 3            | <i>n</i> = 0                                   | <i>n</i> = 3                                         |
| First child epilepsy             | <i>n</i> = 1            | <i>n</i> = 0                                   | <i>n</i> = 1                                         |
| Premature rupture of membranes   | <i>n</i> = 1            | <i>n</i> = 0                                   | <i>n</i> = 1                                         |
| Severe growth retardation        | <i>n</i> = 5            | <i>n</i> = 3                                   | <i>n</i> = 2                                         |
| Retro placental hematoma         | <i>n</i> = 1            | <i>n</i> = 0                                   | <i>n</i> = 1                                         |
| Delivery hemorrhage >1L          | <i>n</i> = 2            | <i>n</i> = 1                                   | <i>n</i> = 1                                         |
| Preterm delivery                 | <i>n</i> = 1            | <i>n</i> = 1                                   | <i>n</i> = 0                                         |
| Threatened preterm delivery      | <i>n</i> = 1            | <i>n</i> = 1                                   | <i>n</i> = 0                                         |
| Toxoplasmosis seroconversion     | <i>n</i> = 1            | <i>n</i> = 1                                   | <i>n</i> = 0                                         |
| Shoulder dystocia                | <i>n</i> = 2            | <i>n</i> = 1                                   | <i>n</i> = 1                                         |
| Rare genetic disease in siblings | <i>n</i> = 3            | <i>n</i> = 1                                   | <i>n</i> = 2                                         |
| Medical termination of pregnancy | <i>n</i> = 2            | <i>n</i> = 1                                   | <i>n</i> = 1                                         |
| Uterine rupture                  | <i>n</i> = 2            | <i>n</i> = 0                                   | <i>n</i> = 2                                         |

Supplementary Table S2: Subgroup analysis of secondary endpoints according to EPDS score at D30 and/or D60

|                                                | Lockdown group<br>(ld group)<br><i>n</i> = 56 |              |               |          | Post Lockdown group<br>(pld group)<br><i>n</i> = 41 |              |               |          | <i>p</i> |  |
|------------------------------------------------|-----------------------------------------------|--------------|---------------|----------|-----------------------------------------------------|--------------|---------------|----------|----------|--|
|                                                | Score<10.5                                    | Score>10.5   | Total         | <i>p</i> | Score <10.5                                         | Score >10.5  | Total         | <i>p</i> |          |  |
| Feeling unable to care for the child           | 5/43 (11.6%)                                  | 7/13 (53.8%) | 12/56 (21.4%) | 0.003    | 2/28 (7.1%)                                         | 1/12 (8.3%)  | 3/40 (7.5%)   | 0.999    | 0.088    |  |
| Spoiled start to motherhood                    | 20/43 (46.5%)                                 | 7/13 (53.8%) | 27/56 (48.2%) | 0.756    | 0/28                                                | 1/12 (8.3%)  | 1/40 (2.5%)   | 0.300    | <0.001   |  |
| Apprehension of the return home by the partner |                                               |              |               |          |                                                     |              |               |          |          |  |
| D30                                            | 7/40 (17.5%)                                  | 2/11 (18.2%) | 9/51 (17.6%)  | 0.999    | 1/29 (3.4%)                                         | 1/9 (11.1%)  | 2/38 (5.3%)   | 0.423    | 0.107    |  |
| D60                                            | 6/26 (23.1%)                                  | 0/3          | 6/29 (20.7%)  | 0.999    | 0/19                                                | 0/4          | 0/23          | 0.999    | 0.028    |  |
| Suffering expressed by partner                 | 17/43 (39.5%)                                 | 9/13 (69.2%) | 26/56 (46.4%) | 0.111    | 2/28 (7.1%)                                         | 0/11         | 2/39 (5.1%)   | 0.999    | <0.001   |  |
| Breastfeeding proceeding                       |                                               |              |               |          |                                                     |              |               |          |          |  |
| D30                                            | 32/41 (78.0%)                                 | 11/11 (100%) | 43/52 (82.7%) | 0.177    | 27/29 (93.1%)                                       | 8/9 (88.9%)  | 35/38 (92.1%) | 0.999    | 0.227    |  |
| <i>easy at D30</i>                             | 19/32 (59.4%)                                 | 7/11 (63.6%) | 26/43 (60.5%) | 0.999    | 22/27 (81.5%)                                       | 4/8 (50.0%)  | 26/35 (74.3%) | 0.162    | 0.233    |  |
| proceeding                                     | 21/27 (77.8%)                                 | 4/4 (100%)   | 25/31 (80.6%) | 0.561    | 19/19 (100%)                                        | 3/4 (75.0%)  | 22/23 (95.7%) | 0.174    | 0.218    |  |
| D60                                            | 11/21(52.4%)                                  | 2/4 (50.0%)  | 13/25 (52.0%) | 0.999    | 17/19 (89.5%)                                       | 1/3 (33.3%)  | 18/22 (81.8%) | 0.073    | 0.063    |  |
| <i>easy at D60</i>                             |                                               |              |               |          |                                                     |              |               |          |          |  |
| Psychological consultation desired             | 3/43 (7.0%)                                   | 3/13 (23.1%) | 6/56(10.7%)   | 0.130    | 0/28                                                | 3/12 (25.0%) | 3/40 (7.5%)   | 0.022    | 0.731    |  |
| Early release                                  | 22/41 (53.7%)                                 | 1/12 (8.3%)  | 23/53 (43.4%) | 0.007    | 6/28 (21.4%)                                        | 2/11 (18.2%) | 8/39 (20.5%)  | 0.999    | 0.027    |  |

Supplementary Table S3: Subgroup analysis of EPDS score at D30 and/or D60 according to risk factors

|                                                             | Lockdown group<br>(ld group)<br><i>n</i> = 56 |                                  | <i>p</i> | Post Lockdown group<br>(pld group)<br><i>n</i> = 41 |                                  | <i>p</i> |
|-------------------------------------------------------------|-----------------------------------------------|----------------------------------|----------|-----------------------------------------------------|----------------------------------|----------|
|                                                             | Score <10.5 at<br>D30 and/or D60              | Score >10.5 at<br>D30 and/or D60 |          | Score <10.5 at D30<br>and/or D60                    | Score >10.5 at<br>D30 and/or D60 |          |
|                                                             | <i>n</i> = 43                                 | <i>n</i> = 13                    |          | <i>n</i> = 29                                       | <i>n</i> = 12                    |          |
| Age (years)                                                 | <i>n</i> = 43                                 | <i>n</i> = 13                    | 0.622    | <i>n</i> = 28                                       | <i>n</i> = 11                    | 0.337    |
| ≤ 24                                                        | 1/43 (2.3%)                                   | 1/13 (7.7%)                      |          | 2/28 (7.1%)                                         | 0/11                             |          |
| 25-29                                                       | 9/43 (20.9%)                                  | 4/13 (30.8%)                     |          | 4/28 (14.3%)                                        | 4/11 (36.4%)                     |          |
| 30-34                                                       | 20/43 (46.5%)                                 | 5/13 (38.5%)                     |          | 12/28 (42.9%)                                       | 5/11 (45.4%)                     |          |
| > 34                                                        | 13/43 (30.2%)                                 | 3/13 (23.0%)                     |          | 10/28 (35.7%)                                       | 2/11 (18.2%)                     |          |
| Parity                                                      | <i>n</i> = 43                                 | <i>n</i> = 13                    | 0.001    | <i>n</i> = 27                                       | <i>n</i> = 11                    | 0.471    |
| nulliparity                                                 | 17/43 (39.5%)                                 | 12/13 (92.3%)                    |          | 10/27 (37.0%)                                       | 6 (54.5%)                        |          |
| parity ≥1                                                   | 26/43 (60.5%)                                 | 1/13 (7.7%)                      |          | 17/27 (63.0%)                                       | 5 (45.5%)                        |          |
| Presence of a history of<br>violence in childhood           | <i>n</i> = 43                                 | <i>n</i> = 13                    | 0.445    | <i>n</i> = 28                                       | <i>n</i> = 12                    | 0.098    |
| none                                                        | 38/43 (88.4%)                                 | 11/13 (84.6%)                    |          | 26/28 (92.8%)                                       | 9/12 (75.0%)                     |          |
| psychological                                               | 2/43 (4.7%)                                   | 2/13 (15.4%)                     |          | 0/28                                                | 2/12 (16.7%)                     |          |
| physical                                                    | 1/43 (2.2%)                                   | 0/13                             |          | 1/28 (3.6%)                                         | 1/12 (8.3%)                      |          |
| physical and psychological                                  | 2/43 (4.7%)                                   | 0/13                             |          | 1/28 (3.6%)                                         | 0/12                             |          |
| Presence of a medical history<br>impacting on the pregnancy | 7/43 (16.3%)                                  | 3/13 (23.1%)                     | 0.682    | 3/27 (11.1%)                                        | 1/11 (9.1%)                      | 0.999    |
| Presence of a psychiatric<br>history                        | 3/43 (7.0%)                                   | 0/13                             | 0.999    | 1/28 (3.6%)                                         | 3/12 (25.0%)                     | 0.073    |
| Presence of a family<br>psychiatric history                 | 7/43 (16.3%)                                  | 1/13 (7.7%)                      | 0.665    | 6/28 (21.4%)                                        | 1/12 (8.3%)                      | 0.652    |
| Presence of a difficult<br>obstetrical history              | 2/43 (4.7%)                                   | 0/13                             | 0.999    | 2/28 (7.4%)                                         | 2/11 (18.2%)                     | 0.564    |
| Precarious situation                                        | 42/43 (97.7%)                                 | 11/13 (84.6%)                    | 0.131    | 28/28 (100.0%)                                      | 12/12 (100.0%)                   | 0.999    |
| Homeless patient                                            | 43/43 (100.0%)                                | 12/13 (92.3%)                    | 0.232    | 9/27 (33.3%)                                        | 4/11 (36.4%)                     | 0.999    |
| Presence of marital<br>difficulties                         | 42/43 (97.7%)                                 | 13/13 (100.0%)                   | 0.999    | 1/28 (3.6%)                                         | 0/12                             | 0.999    |
| Insufficient support for the<br>patient                     | 42/43 (97.7%)                                 | 13/13 (100.0%)                   | 0.999    | 28/28 (100.0%)                                      | 12/12 (100.0%)                   | 0.999    |

|                                                  |               |               |       |                |                |       |
|--------------------------------------------------|---------------|---------------|-------|----------------|----------------|-------|
| Existence of a migratory pathway for the patient | 5/43 (11.6%)  | 1/13 (7.7%)   | 0.999 | 1/28 (3.6%)    | 0/12           | 0.999 |
| Consumption of toxic substances                  | 6/43 (14.0%)  | 3/13 (23.1%)  | 0.419 | 4/28 (14.3%)   | 0/12           | 0.267 |
| Current unwanted pregnancy                       | 38/43 (88.4%) | 12/13 (92.3%) | 0.999 | 27/28 (96.4%)  | 12/12 (100.0%) | 0.999 |
| Pregnancy difficult to obtain                    | 6/39 (15.8%)  | 2/12 (16.7%)  | 0.999 | 2/28 (7.7%)    | 2/12 (16.7%)   | 0.577 |
| Current pregnancy at risk                        | 13/42 (31.0%) | 3/11 (27.3%)  | 0.999 | 9/27 (33.3%)   | 4/11 (36.4%)   | 0.999 |
| Presence of per-partum stress                    | 16/42 (38.1%) | 8/13 (61.5%)  | 0.202 | 13/28 (46.4%)  | 11/12 (91.7%)  | 0.012 |
| Delivery                                         | <i>n</i> = 43 | <i>n</i> = 13 | 0.999 | <i>n</i> = 27  | <i>n</i> = 11  | 0.648 |
| instrumental                                     | 31/43 (72.1%) | 10/13 (76.9%) |       | 21/27 (77.8%)  | 10/11 (90.9%)  |       |
| C-section                                        | 12/43 (27.9%) | 3/13 (23.1%)  |       | 6/27 (22.2%)   | 1/11 (9.1%)    |       |
| Complications of childbirth                      | <i>n</i> = 43 | <i>n</i> = 13 | 0.664 | <i>n</i> = 27  | <i>n</i> = 11  | 0.501 |
| none                                             | 40/43 (93.1%) | 12/13 (92.3%) |       | 26/27 (96.3%)  | 10/11 (90.9%)  |       |
| Preterm birth                                    | 1/43 (2.3%)   | 1/13 (7.7%)   |       | 0/27           | 0/11           |       |
| Obstetrical anal sphincter injury (stage 3 or 4) | 0/43          | 0/13          |       | 0/27           | 0/11           |       |
| severe delivery hemorrhage > 1000mL              | 1/43 (2.3%)   | 0/13          |       | 1 (3.7%)       | 1/11 (9.1%)    |       |
| uterine rupture                                  | 1/43 (2.3%)   | 0/13          |       | 0/27           | 0/11           |       |
| Traumatic experience of childbirth               | 5/42 (11.9%)  | 5/13 (38.5%)  | 0.045 | 0/27           | 2/12 (16.7%)   | 0.085 |
| Absence of partner at delivery                   | <i>n</i> = 43 | <i>n</i> = 13 | 0.999 | <i>n</i> = 28  | <i>n</i> = 12  | 0.300 |
| present                                          | 6/43 (14.0%)  | 1/13 (7.7%)   |       | 0/28           | 0/12           |       |
| unwanted absence                                 | 35/43 (81.4%) | 12/13 (92.3%) |       | 28/28 (100.0%) | 11/12 (91.7%)  |       |
| desired absence                                  | 2/43 (4.7%)   | 0/13          |       | 0/28           | 1/12 (8.3%)    |       |
| Separation mother/child                          | 3/43 (7.0%)   | 1/13 (7.7%)   | 0.999 | 0/28           | 0/12           | 0.999 |
| Length of stay >3 days                           | 18/37 (48.6%) | 9/12 (75.0%)  | 0.332 | 14/26(53.8%)   | 2/10 (20.0%)   | 0.133 |
| Breastfeeding                                    | <i>n</i> = 43 | <i>n</i> = 13 | 0.221 | <i>n</i> = 28  | <i>n</i> = 12  | 0.039 |
| artificial                                       | 21/43 (48.8%) | 8/13 (61.5%)  |       | 23/28 (82.1%)  | 5/12 (41.7%)   |       |
| easy breastfeeding                               | 13/43 (30.2%) | 5/13 (39.5%)  |       | 4/28 (14.3%)   | 5/12 (41.7%)   |       |
| complicated breastfeeding                        | 9/43 (20.9%)  | 0/13          |       | 1/28 (3.6%)    | 2/12 (16.6%)   |       |
